# Supplementary material for: Identification and evolution analysis of the JAZ gene family in maize
Source: BMC Genomics. 2021 Apr 10;22:256. doi: 10.1186/s12864-021-07522-4 (PMC8037931; doi:10.1186/s12864-021-07522-4)
Supplement: Supplementary file 1 — Additional file 1: Supplemental Table 1. List of members of JAZ family in this study. Supplemental Table 2. Rice JAZ family. Supplemental Table 3. Sorghum JAZ family. Supplemental Table 4. Brachypodium JAZ family. Supplemental Table 5. Search results from plant repeats database. Supplemental Table 6. Primers used in JAZ gDNA cloning. Supplemental Table 7. Primers used in JAZ cDNA cloning. Supplemental Table 8. Primers used in JAZ PCR of oat-maize addition lines [file 12864_2021_7522_MOESM1_ESM.xlsx]

## Sheet: Table S1
Supplemental Table 1 List of members of JAZ family in this study
	Eudicotsa	Monocotsb
	At	Zm	Os	Sb	Bd
JAZ	12	16	12	9	11
a Arabidopsis thaliana (At) genome data from TAIR (http://www.arabidopsis.org)
b Zea Mays (Zm) genome data from (http://www.maizesequence.org);
Oryza sativa (Os) genome data from TIGR (http://rice.plantbiology.msu.edu);
Sorghum bicolor (Sb) and Brachypodium distachyon (Bd) genome data from Gramene (http:///www.gramene.org)

## Sheet: Table S2
Supplemental Table 2 Rice JAZ family
Synonyma	Protein name	Accession no.	Chromb	Splc	Group	TIFY motif	Jas motif	Locd	Orge	Staf
OsJAZ1	OsZIM13	LOC_Os09g26780	9	1	II	TIFYGG	SLHRFLEKRKGRMNANAPY	CP	i,l	V,R
OsJAZ2	OsZIM5	LOC_Os04g55920	4	3	II	TIFYGG	SLQRFLEKRRDSRLVSKAPY	N	i	R
OsJAZ3-1	OsZIM12	LOC_Os07g42370	7	3	II	TIFYGG	SLHRFLEKRKDRLNAKTPY	N	i	R
OsJAZ3-2	OsZIM11	LOC_Os03g28940	3	2	II	TIFYGG	SLHRFLEKRKDRLQAKAPY	N	l	V
OsJAZ4-1	OsZIM15	LOC_Os03g08330	3	1	II	TIFYGG	SLQRFFAKRKDRLAATTPY	CP	l	V
OsJAZ4-2	OsZIM16	LOC_Os03g08320	3	1	II	TIFYGG	SLQRFLEKRKNRIVVAEPL	N	a,l	V,R
OsJAZ4-3	OsZIM14	LOC_Os03g08310	3	1	II	TIFYAG	SLKRFLAKRKATPASARSS	N	a	R
OsJAZ4-4	OsZIM18	LOC_Os10g25230	10	1	II	TIFYGG	SLQRFMEKRKGRLAARGQPY	N	a,l	V,R
OsJAZ4-5	OsZIM17	LOC_Os10g25290	10	1	II	TIFYDG	SLQRFLQKRKHRITTTSEPY	N	i,l	V,R
OsJAZ5-1	OsZIM8	LOC_Os09g23660	9	2	II	TIFYAG	SLARFLEKRKERVTTVAPY	N	l	V
OsJAZ5-2	OsZIM7	LOC_Os08g33160	8	2	II	TIFYDG	SLARFLEKRKERVSSVAPY	N	i	R
OsJAZ6	OsZIM6	LOC_Os07g05830	7	1	II	TIFYNG	SLQRFLEKRKTRAAAPLYA	N	a	R
a Nomenclature of JAZ subfamily based on the protein with Jas domain
b Chromosome location from Rice Genome Brower (RGB)
c Number of putative splicing pattern based on RGB
d Subcellular localization predicted by Protcomp from Softberry: CP, chloroplast; N, nuclear
e Organs with highest expression from PLEXdb: a, anthers; i, inflorescence; l, leaf
f Developmental stage with highest expression from PLEXdb: V, vegatative; R, reproductive

## Sheet: Table S3
Supplemental Table 3 Sorghum JAZ family
Synonyma	Protein name	Accession no.	Chromb	Splc	Group	TIFY motif	Jas motif	Locd
SbJAZ1	SbZIM18	Sb02g025720	2	1	II	TIFYGG	SLHRFLEKRKDRITAKAPY	N
SbJAZ2	SbZIM4	Sb06g031060	6	1	II	TIFYGG	SLQRFLEKRRDRIVSKAPY	N
SbJAZ3-1	SbZIM10	Sb02g039190	2	1	II	TIFYGG	SLHRFLEKRKDRLNAKTPY	CP
SbJAZ3-2	SbZIM8	Sb01g033020	1	1	II	TIFYGG	SLRRFLEKRKDRLTAKAPY	CP
SbJAZ4-1	SbZIM17	Sb01g027325	1	1	II	TIFYGR	SLQQFLAKRKDRLVERVPY	CP
SbJAZ4-2	SbZIM19	Sb01g045180	1	1	II	TIFYGG	SLKRFLEKRKNRLTAADPY	N
SbJAZ4-3	SbZIM11	Sb01g045190	1	1	II	TIFYGG	SLRRFLAKRKDRSSSASPAPY	N
SbJAZ5-1	SbZIM7	Sb02g024270	2	1	II	TIFYAG	SLARFLEKRKERVTTAAPY	N
SbJAZ5-2	SbZIM6	Sb07g020910	7	1	II	TIFYNG	SLARFLEKRKERVTSVEPY	N
a Nomenclature of JAZ subfamily based on the protein with Jas domain
b Chromosome location from Gramene
c Number of putative splicing pattern based on Gramene
d Subcellular localization predicted by Protcomp from Softberry: CP, chloroplast; N, nuclear

## Sheet: Table S4
Supplemental Table 4 Brachypodium JAZ family
Synonyma	Protein name	Accession no.	Chromb	Splc	Group	TIFY motif	Jas motif	Locd
BdJAZ1	BdZIM12	Bradi4g31240	4	2	II	TIFYGG	SLHRFLEKRKGRVIAKAPY	N,Mt
BdJAZ2	BdZIM5	Bradi5g24410	5	2	II	TIFYGG	SLQRFLEKRRDSRIVSKAPY	N
BdJAZ3-1a	BdZIM10	Bradi3g10820	3	2	II	TIFYNG	SLHRFLEKRKDRLHAKAPY	N
BdJAZ3-1b	BdZIM11	Bradi1g21490	1	1	II	TIFYGG	SLHRFLEKRKDRLHASAPY	N
BdJAZ4-1	BdZIM14	Bradi1g72590	1	1	II	TIFYGG	SLQRFFEKRKDRLGARAPY	N
BdJAZ4-2	BdZIM15	Bradi1g72600	1	1	II	TIFYGG	SLQRFLEKRKSRLAAADPY	N
BdJAZ4-3	BdZIM13	Bradi1g72610	1	1	II	TIFYGG	SLQRFLSKRKDRGAAVAV	N
BdJAZ4-4	BdZIM16	Bradi3g23190	3	1	II	TIFYGG	SLQRFMEKRKGRRAVPY	CP
BdJAZ5-1	BdZIM8	Bradi4g29830	4	1	II	TIFYAG	SLARFLEKRKERVTTAAPY	N
BdJAZ5-2	BdZIM7	Bradi3g36380	3	2	II	TIFYNG	SLARFLEKRKERVSIVAPY	N
BdJAZ6	BdZIM6	Bradi1g58490	1	1	II	TIFYGG	SLQRFLQKRKARAAAAPY	N
a Nomenclature of JAZ subfamily based on the protein with Jas domain
b Chromosome location from Gramene
c Number of putative splicing pattern based on Gramene
d Subcellular localization predicted by Protcomp from Softberry: CP, chloroplast; N, nuclear; Mt, Mitochondrial

## Sheet: Table S5
Supplemental Table 5 Search results from plant repeats database
		maize		rice		sorghum		brachypodium
JAZ1		1-2		many		0		0-1
JAZ2		2		many		0		0
JAZ3		0-1		many		0		0-1
JAZ4		many		many		1-2		many
JAZ5		0-1		many		0		0-1
JAZ6		x		many		x		many

## Sheet: Table S6
Supplemental Table 6 Primers used in JAZ gDNA cloning
Gene	Forward	Reverse
ZmJAZ1a	GCGGCCAGCGGGTGAAGTGA	CGACCGGCCGGCCTATGTAAC
ZmJAZ1b	GACCCGTCGCTCTCCCACATTCC	CACGTCCGTCTCCAGCAGCAAACA
ZmJAZ2a	CCGCGCCCCTTTCCCTTTCTC	GGTCCCCATTATTAGTGCGGTTCC
ZmJAZ2b	GGAGCGGAATATTAAGACGGAGAC	AGCCCCATCATCTTTCACACTA
ZmJAZ3-1a	AGCGGCTGCGACCTGCGAGTG	GGTGCCGTTGCTGTGCCGTCTTAT
ZmJAZ3-1b	GCGCCGCGGGGGTCTTTTA	AGGCTTTGGTGAGGTTTGCTGTGC

## Sheet: Table S7
Supplemental Table 7 Primers used in JAZ cDNA cloning
Gene	Forward	Reverse
ZmJAZ1a	GCGGCCAGCGGGTGAAGTGA	CGACCGGCCGGCCTATGTAAC
ZmJAZ1b	AGGCGTCTCTGGTTATTGCTTGTC	TCGGGCAACATTCATCACATCTCC
ZmJAZ2a	CCGCGCCCCTTTCCCTTTCTC	GGTCCCCATTATTAGTGCGGTTCC
ZmJAZ2b	GCTGGCCGGCCTCTTTCTCTTT	TCAGCCTTCACCGATGGGACTC
ZmJAZ3-1a	AGCGGCTGCGACCTGCGAGTG	GGTGCCGTTGCTGTGCCGTCTTAT
ZmJAZ3-1b	CAGCGCGGAGGAGGTGGAG	AGGCTTTGGTGAGGTTTGCTGTGC

## Sheet: Table S8
Supplemental Table 8 Primers used in JAZ PCR of oat-maize addition lines
Gene	Forward	Reverse
ZmJAZ1a	GCGGCCAGCGGGTGAAGTGA	CGACCGGCCGGCCTATGTAAC
ZmJAZ1b	GACCCGTCGCTCTCCCACATTCC	CACGTCCGTCTCCAGCAGCAAACA
ZmJAZ2a	AAGGTCTGGAATGTTGCCGATGTC	AACGTGTCCGCTAATCCTTCA
ZmJAZ2b	GTTCCACGCTGCTGCTACCAC	AGCCCCATCATCTTTCACACTA
ZmJAZ3-1a	AGCGGCTGCGACCTGCGAGTG	GGTGCCGTTGCTGTGCCGTCTTAT
ZmJAZ3-1b	GCGCCGCGGGGGTCTTTTA	AGGCTTTGGTGAGGTTTGCTGTGC
